# Supplementary material for: Awareness, knowledge and trust in the Greek authorities towards COVID-19 pandemic: results from the Epirus Health Study cohort
Source: bioRxiv or medRxiv preprint supplement (doi:10.1101/2020.11.10.20229146), 2020-11-17

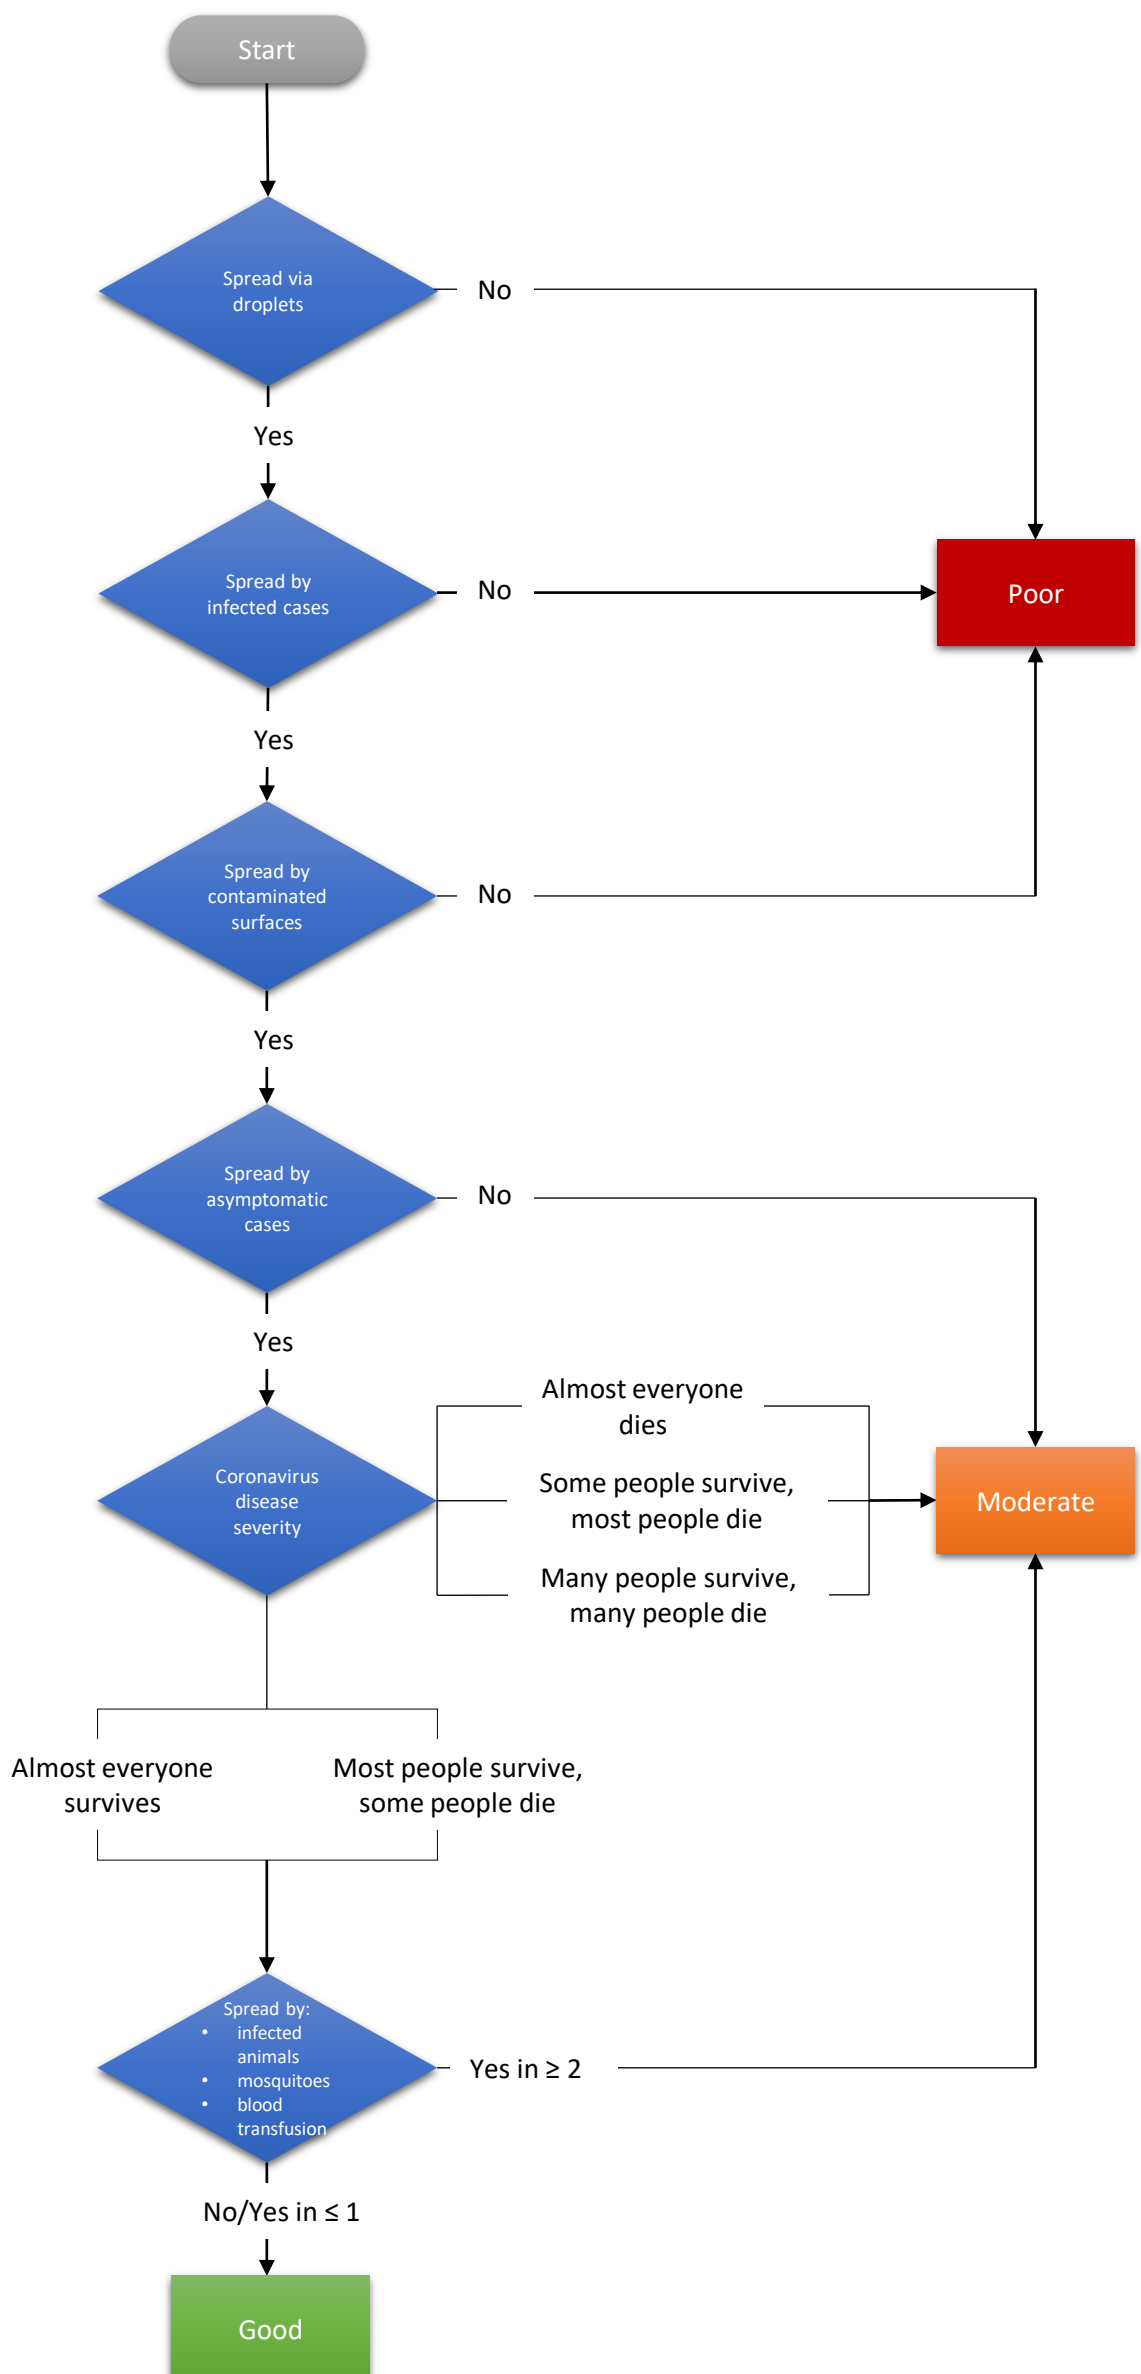

Supplement: Supplementary file [file media-1.pdf]
